# Supplementary material for: The Use of Robotic-Assisted Total Hip Arthroplasty in Developmental Dysplasia of the Hip
Source: PubMed Central journal article supplement — Arthroplast Today. 2020 Sep 8;6(4):770–6. doi: 10.1016/j.artd.2020.07.022 (PMC7490591; doi:10.1016/j.artd.2020.07.022), 2020-09-08
Supplement: mmc4.pdf [file mmc4.pdf]

# CONFLICT OF INTEREST STATEMENT

## *American Association of Hip and Knee Surgeons*

(Adopted from the American Academy of Orthopaedic Surgeons disclosure statement)

The following form **must be filled out completely and submitted by each author (example, 6 authors, 6 forms).**  
**All items require a response. If there is no relevant disclosure for a given item, enter "None."**

The Use of Robotic-Assisted Total Hip Arthroplasty in Developmental Dysplasia of the Hip  
Manuscript Title

1. Royalties from a company or supplier (The following conflicts were disclosed)  
Stryker IP royalties
2. Speakers bureau/paid presentations for a company or supplier (The following conflicts were disclosed)  
None
- 3A. Paid employee for a company or supplier (The following conflicts were disclosed)  
None
- 3B. Paid consultant for a company or supplier (The following conflicts were disclosed)  
Stryker
- 3C. Unpaid consultants for a company or supplier (The following conflicts were disclosed)  
None
4. Stock or stock options in a company or supplier (The following conflicts were disclosed)  
None
5. Research support from a company or supplier as a Principal Investigator (The following conflicts were disclosed)  
Stryker
6. Other financial or material support from a company or supplier (The following conflicts were disclosed)  
None
7. Royalties, financial or material support from publishers (The following conflicts were disclosed)  
None
8. Medical/Orthopaedic publications editorial/governing board (The following conflicts were disclosed)  
None
9. Board member/committee appointments for a society (The following conflicts were disclosed)  
None

**Each author must sign AND print or type his/her name, date and submit a separate form**

In addition, one BLINDED Conflict of Interest form (no author names used) should be submitted per manuscript with all author disclosures.

Seth Jerabek  
Author Name (Print or Type)

  
Author Signature

03/05/2020  
Date
